# Supplementary material for: Ammonia-assisted epitaxial assembly of Cu2O@Ag yolk–shell and Ag cage
Source: Royal Society of Chemistry journal article supplement (doi:10.1039/c4ra01805b), 2014-01-01
Supplement: c4ra01805b1.pdf [file c4ra01805b1.pdf]

# **Ammonia-Assistant Epitaxial Assembly of Cu<sub>2</sub>O@Ag Yolk-Shell and Ag Cage**

*Jiqiao Zhang, Cui Zhang, and Shuangxi Liu\**

Institute of New Catalytic Materials Science and Key Laboratory of Advanced Energy

Materials Chemistry (Ministry of Education), College of Chemistry, Nankai

University, Tianjin 300071, People's Republic of China

E-mail: [sxliu@nankai.edu.cn](mailto:sxliu@nankai.edu.cn)

## Experimental Details and Data

### Chemicals

Copper acetate, sodium hydroxide, ascorbic acid, aqueous ammonia, silver nitrate, and polyvinylpyrrolidone (PVP, MW~10000) were analytical grade and purchased from Tianjin Heowns Biochemical Technology Co., Ltd. Distilled water was used throughout the experiments.

### Preparation of Samples

#### Preparation of 26-facet Cu<sub>2</sub>O

In short, 26-facet polyhedrons Cu<sub>2</sub>O were synthesized as a typical proposed. <sup>[1]</sup>

#### Preparation of CA<sub>1</sub>

0.2 g silver nitrate was resolved in 20 mL distilled water, then ammonia aqueous solution (0.1M) was added drop by drop to the above solution for forming [Ag(NH<sub>3</sub>)<sub>2</sub>]<sup>+</sup> complexant transparent solution. The as-synthesized Cu<sub>2</sub>O dispersed in distilled water by sonication and dropped aliquot of [Ag(NH<sub>3</sub>)<sub>2</sub>]<sup>+</sup> complexant transparent solution were mixed at room temperature with magnetic stirring for 2h under 500W Xenon lamp irradiation, the color of the solution changed gradually from brick-red to gray, indicating the formation of silver shell.

#### Preparation of CA<sub>2</sub>

The experiment differed from the above CA<sub>1</sub> in adding molar ratio of Cu<sub>2</sub>O and [Ag(NH<sub>3</sub>)<sub>2</sub>]<sup>+</sup> complexant was 1:2, labelled as CA<sub>2</sub>.

#### Preparation of CA<sub>3</sub>

In dark condition, the other conditions were kept constant as the above CA<sub>1</sub>, labelled as CA<sub>3</sub>, to investigate the role of the Xenon lamp in the preparation process.

#### Preparation of CA<sub>4</sub>

In another counterpart experiment, the same concentration of silver nitrate aqueous solution as that of the [Ag(NH<sub>3</sub>)<sub>2</sub>]<sup>+</sup> complexant was dropped into the Cu<sub>2</sub>O suspension by magnetic stirring under 500W Xenon lamp irradiation, noted as CA<sub>4</sub>.

All samples were reacted for 2 h. The final product was collected, washed with ethanol and distilled water several times and dried in vacuum oven at 65°C for 12h.

#### Extraction Cu<sub>2</sub>O-yolk of CA<sub>1</sub>

The prepared Cu<sub>2</sub>O@Ag yolk-shell composites (CA<sub>1</sub>) were immersed in ammonia solution (12 wt%) and stirred with magnetic force for 30 min to remove the inner Cu<sub>2</sub>O yolk. <sup>[2,3]</sup> The precipitates were separated by centrifugation, washed with deionized water and ethanol, and then dried in vacuum oven at 65°C for 12 h, marked as CA<sub>5</sub>.

### Characterization

Powder X-ray diffraction (XRD) patterns of catalysts were obtained on a Bruker D8 Focus diffractometer with CuK $\alpha$  radiation ( $\lambda=1.54184 \text{ \AA}$ ) at scanning speed of 0.01°/s in a scan range of 20° < 2 $\theta$  < 80° operating at 40 kV and 40 mA. Scanning electron microscopy (SEM) images were obtained on a JEOL JSM-7500F field-emission scanning electron microscope at an accelerating voltage of 5 kV. High resolution transmission electron microscopy (HRTEM) measurements were carried out on a Philips Tecnai G<sup>2</sup> F20 electron microscope operating at 200 kV. N<sub>2</sub> adsorption-desorption analysis was performed on a Micromeritics TriStar 3000 apparatus at 77K.

Table S<sub>1</sub> Different samples synthesized under different conditions

| Sample          | Xenon lamp      | NH <sub>3</sub> /H <sub>2</sub> O | Molar ratio Cu <sub>2</sub> O to Ag <sup>+</sup> |
|-----------------|-----------------|-----------------------------------|--------------------------------------------------|
| CA <sub>1</sub> | Y <sup>a)</sup> | Y                                 | 10:1                                             |
| CA <sub>2</sub> | Y               | Y                                 | 1:2                                              |
| CA <sub>3</sub> | N <sup>b)</sup> | Y                                 | 10:1                                             |
| CA <sub>4</sub> | Y               | N                                 | 10:1                                             |

a) Y means used; b) N means not used.

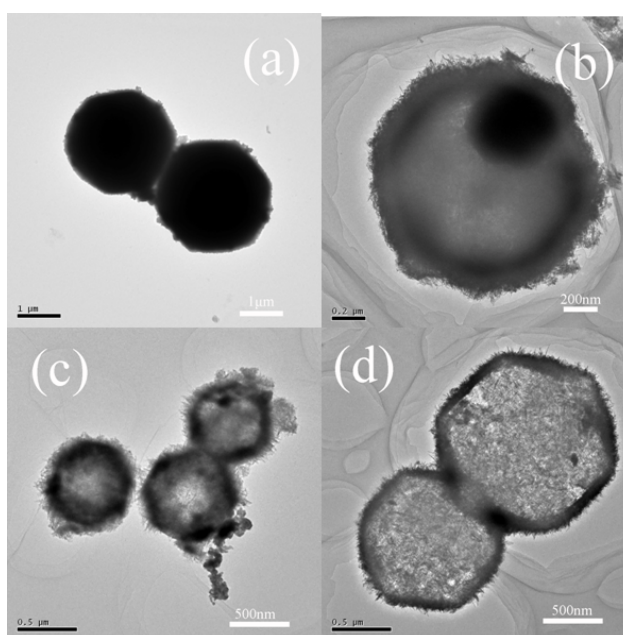

Fig. S<sub>1</sub> TEM images of the Ag cage synthesized processing by in site redox, epitaxial assembly with Cu<sub>2</sub>O and [Ag(NH<sub>3</sub>)<sub>2</sub>]<sup>+</sup> complexant: a) for half an hour; b) for 1hour; c) for 1.5h; d) for 2 hour.

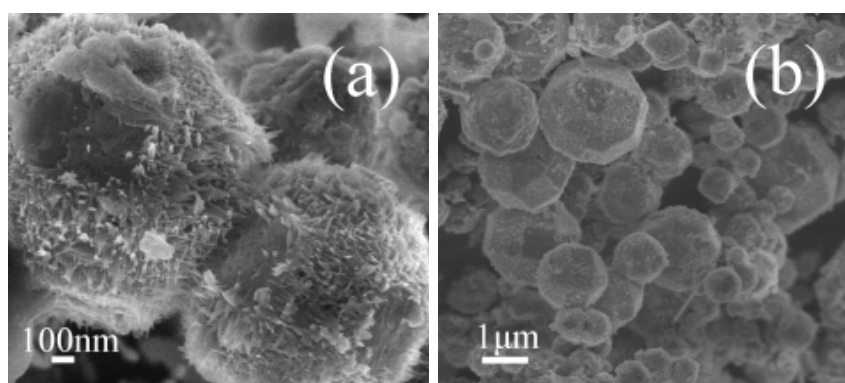

Fig. S<sub>2</sub> SEM images of CA<sub>3</sub>. a)-b) are high magnification images of Cu<sub>2</sub>O@Ag yolk-shell composite formed by reaction of Cu<sub>2</sub>O with Ag(NH<sub>3</sub>)<sub>2</sub><sup>+</sup> complexant (molar ratio was 10:1) in dark.

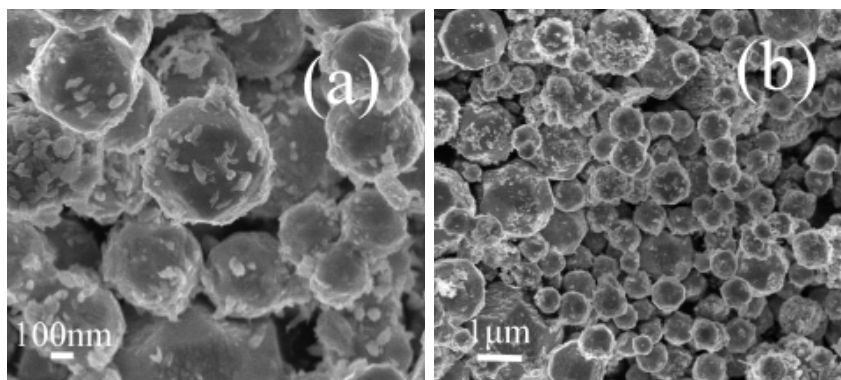

Fig.S<sub>3</sub> SEM images of CA<sub>4</sub>. a)-b) are different magnification images of Ag/Cu<sub>2</sub>O composites, by reaction of the Cu<sub>2</sub>O with Ag<sup>+</sup> from AgNO<sub>3</sub> (molar ratio was 10:1) under 500W Xenon lamp irradiation in air.

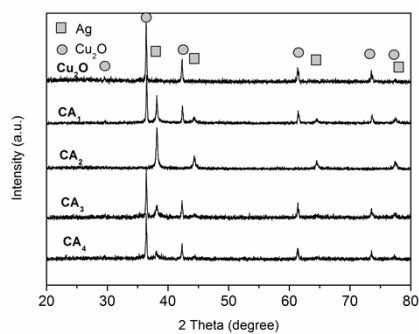

Fig. S<sub>4</sub> XRD patterns of all the products prepared correspondingly as the condition in Table S<sub>1</sub>.

#### References

- 1 X. P. Wang, S. H. Jiao, D. P. Wu, Q. Li, J. G. Zhou, K. Jiang, and D. S. Xu, *CrystEngComm* 2013, **15**, 1849.
- 2 S. H. Jiao, L. F. Xu, K. Jiang, D. S. Xu, *Adv. Mater.* 2006, **18**, 1174.
- 3 R. N. Briskman, *Sol. Energy Mater. Sol.Cells* 1992, **27**, 361.
